# Supplementary material
Source: publisher figshare collection journal article supplement (https://karger.figshare.com/ndownloader/files/28746678)
Supplement: Supplementary file 1 [file 28746678]

**Members of the Researcher Team on Psychiatry, School of Medicine, Libre University Cali Colombia CINEPSIS.**

- Delia Hernández
- Carlos Alberto Hurtado Gonzales
- Juliana Vergel Hernándeza
- María Eugenia Barrera Robledo
